# Supplementary material for: Construction of a novel mechanoluminescent phosphor Li2MgGeO4:xMn2+ by defect control
Source: Royal Society of Chemistry journal article supplement (doi:10.1039/d1dt01125a), 2021-01-01
Supplement: d1dt01125a1.pdf [file d1dt01125a1.pdf]

## Electronic Supplementary Information

### Construct a novel mechanoluminescent phosphor $\text{Li}_2\text{MgGeO}_4:x\text{Mn}^{2+}$ by defect control

Yuxing Bai,<sup>a</sup> Zhongzhong Zheng,<sup>a</sup> Li Wu,<sup>\*a</sup> Yongfa Kong,<sup>a</sup> Yi Zhang <sup>\*b</sup> and Jingjun Xu <sup>a</sup>

<sup>a</sup>Key Laboratory of Weak-Light Nonlinear Photonics, Ministry of Education, School of Physics, Nankai University, Tianjin 300071, China. E-mail: \*lwu@nankai.edu.cn.

<sup>b</sup>College of Electronic Information and Optical Engineering and Tianjin Key Laboratory of Photo-electronic Thin Film Devices and Technology, Nankai University, Tianjin 300071, China. E-mail: \*yizhang@nankai.edu.cn.

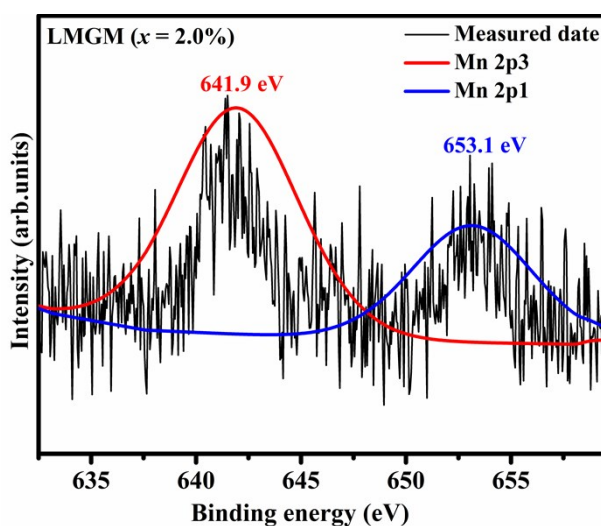

Fig. S1 High-resolution XPS spectra of Mn 2p for  $\text{Li}_{2-x}\text{MgGeO}_4:x\text{Mn}^{2+}$  ( $x = 2.0\%$ ).

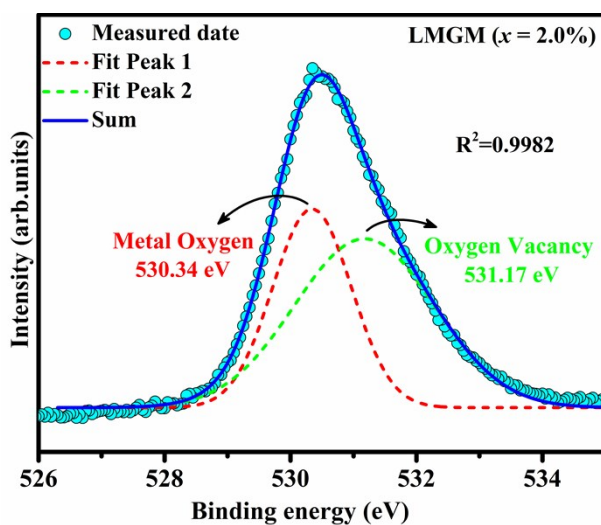

Fig. S2 High-resolution XPS spectra of O 1s for  $\text{Li}_{2-x}\text{MgGeO}_4:x\text{Mn}^{2+}$  ( $x = 2.0\%$ ).

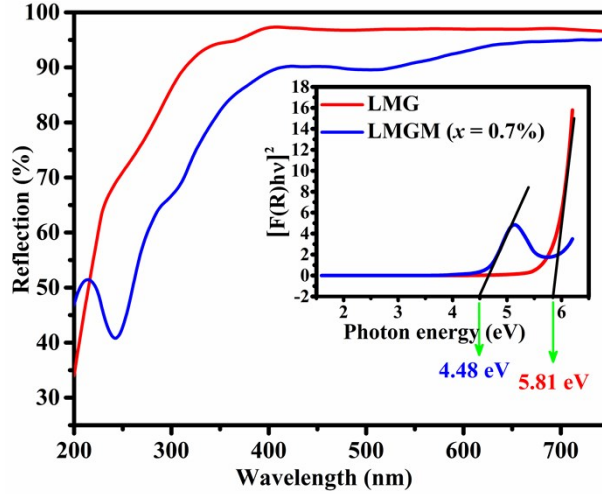

**Fig. S3** The DR spectra of  $\text{Li}_2\text{MgGeO}_4$  and  $\text{Li}_{2-x}\text{MgGeO}_4:x\text{Mn}^{2+}$  ( $x = 0.7\%$ ).

The thermal stability of phosphors at high working temperature is a significant index to assess their application value.<sup>1</sup> As seen in Fig. S4a, the PL intensity decreases gradually with the increase in temperature owing the effect of thermal quenching, which reaches 66.8% at 100 °C and 44.9% at 150 °C of the initial intensity at 25 °C. Correspondingly, the activation energy can be calculated via the Arrhenius equation (Fig. S4b):

$$I_T = I_0/[1 + \exp(-E_a/kT)] \quad (1)$$

where  $I_0$  and  $I_T$  represent the PL intensities at room temperature and measuring temperature, respectively;  $E_a$  is the activation energy,  $k$  is the Boltzmann constant ( $8.617 \times 10^{-5} \text{ eV}\cdot\text{K}^{-1}$ ).<sup>2</sup> The value of 0.3096 eV reflects the acceptable thermal stability. Besides, the peak positions appear the tendency of blue-shift overall, which could be resulted from the lattice expansion at high temperature to lead to a decline in energy level splitting of  $\text{Mn}^{2+}$  ions.

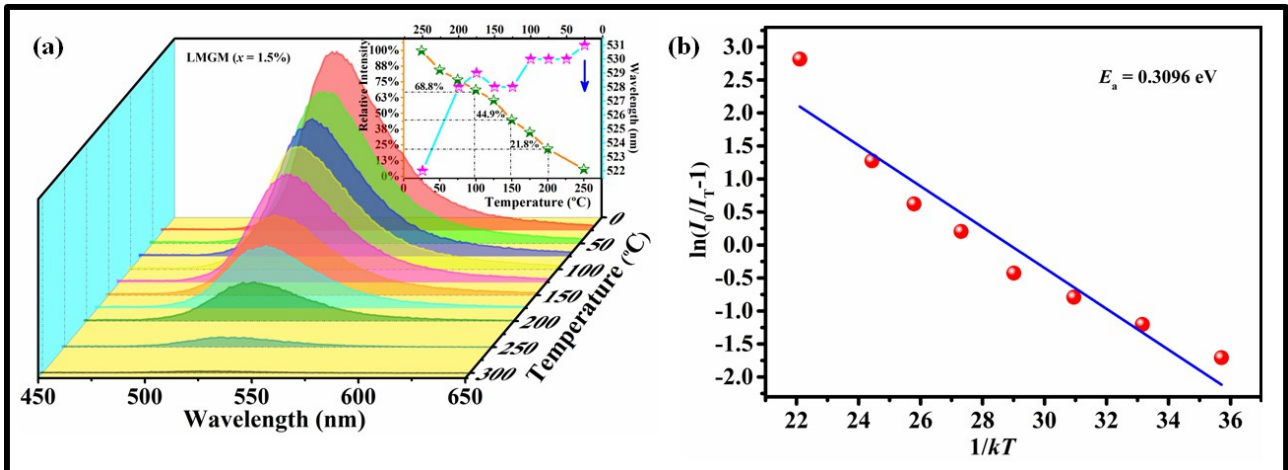

**Fig. S4** (a) Temperature-dependent PL spectra under 256 nm excitation from 25 °C to 300 °C for  $\text{Li}_{2-x}\text{MgGeO}_4:x\text{Mn}^{2+}$  ( $x = 1.5\%$ ); the inset shows the wavelength and intensity of peak versus temperature. (b) The  $\ln(I_0/I_T - 1)$  vs.  $1/kT$  activation energy graph for thermal quenching of  $\text{Li}_{2-x}\text{MgGeO}_4:x\text{Mn}^{2+}$  ( $x = 1.5\%$ ).

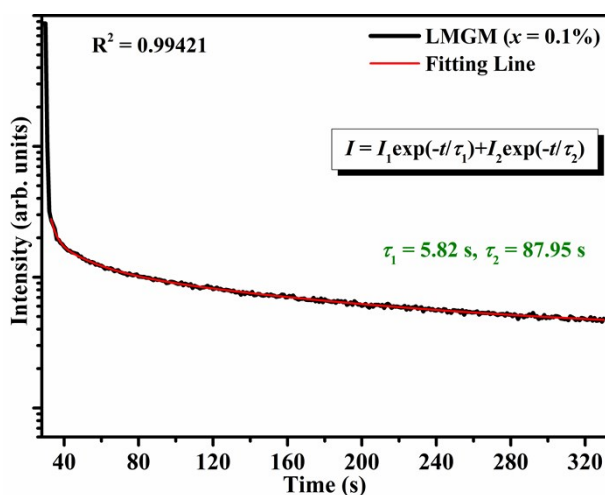

Fig. S5 The long persistent luminescence decay spectrum of  $\text{Li}_{2-x}\text{MgGeO}_4:x\text{Mn}^{2+}$  ( $x = 0.1\%$ ).

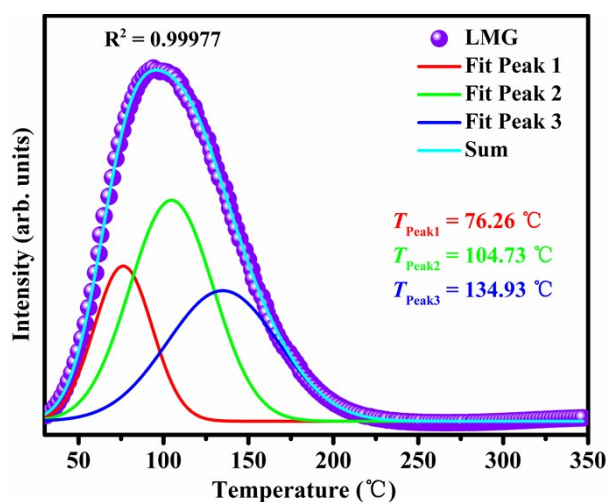

Fig. S6 ThL curve of  $\text{Li}_2\text{MgGeO}_4$ .

**Table S1** Lattice parameters and agreement factors for  $\text{Li}_2\text{MgGeO}_4:x\text{Mn}^{2+}$  ( $x = 1.5\%$ ) refined by Rietveld method, when  $\text{Mn}^{2+}$  ions occupy all kinds of the cationic sites.

| Doped concentration      | $x = 0.015$  |
|--------------------------|--------------|
| Crystal system           | orthorhombic |
| Space group              | $Pmn2_1$     |
| $a$ (Å)                  | 6.4042(2)    |
| $b$ (Å)                  | 5.4686(2)    |
| $c$ (Å)                  | 5.0063(16)   |
| Volume (Å <sup>3</sup> ) | 175.329(11)  |
| $Z$                      | 2            |
| $R_p$ (%)                | 13.35        |
| $R_{wp}$ (%)             | 18.08        |
| $S$                      | 1.35         |

**Table S2** Lattice parameters and agreement factors for  $\text{Li}_2\text{MgGeO}_4:x\text{Mn}^{2+}$  ( $x = 1.5\%$ ) refined by Rietveld method, when  $\text{Mn}^{2+}$  ions occupy the cationic sites of  $\text{Li}^+$  and  $\text{Mg}^{2+}$ .

| Doped concentration      | $x = 0.015$  |
|--------------------------|--------------|
| Crystal system           | orthorhombic |
| Space group              | $Pmn2_1$     |
| $a$ (Å)                  | 6.3990(4)    |
| $b$ (Å)                  | 5.4744(3)    |
| $c$ (Å)                  | 5.0013(2)    |
| Volume (Å <sup>3</sup> ) | 175.198(15)  |
| $Z$                      | 2            |
| $R_p$ (%)                | 10.62        |
| $R_{wp}$ (%)             | 15.31        |
| $S$                      | 1.44         |

**Table S3** Occupancy of Mn<sup>2+</sup> occupying all the cationic sites for Li<sub>2</sub>MgGeO<sub>4</sub>: $x$ Mn<sup>2+</sup> ( $x = 1.5\%$ ) refined by Rietveld method.

|     | Site | $x$     | $y$       | $z$       | Occupancy |
|-----|------|---------|-----------|-----------|-----------|
| Li  | 4b   | 0.24948 | 0.16699   | 0.00234   | 0.9881(9) |
| Mn1 | 4b   | 0.24948 | 0.16699   | 0.00234   | 0.0119(9) |
| Mg  | 2a   | 0.000   | 0.3560(4) | 0.4100(5) | 1.00(7)   |
| Mn2 | 2a   | 0.000   | 0.3560(4) | 0.4100(5) | 0.00(7)   |
| Ge  | 2a   | 0.000   | 0.6719(9) | 0.0280(4) | 1.018(2)  |
| Mn3 | 2a   | 0.000   | 0.6719(9) | 0.0280(4) | -0.018(2) |
| O1  | 4b   | 0.2318  | 0.8238    | 0.8958    | 1.00      |
| O2  | 2a   | 0.000   | 0.3150(8) | 0.8950(7) | 1.00      |
| O3  | 2a   | 0.000   | 0.66978   | 0.35710   | 1.00      |

**Table S4** Occupancy of Mn<sup>2+</sup> occupying the cationic sites of Li<sup>+</sup> and Mg<sup>2+</sup> for Li<sub>2</sub>MgGeO<sub>4</sub>: $x$ Mn<sup>2+</sup> ( $x = 1.5\%$ ) refined by Rietveld method.

|     | Site | $x$       | $y$       | $z$       | Occupancy  |
|-----|------|-----------|-----------|-----------|------------|
| Li  | 4b   | 0.24948   | 0.16699   | 0.00234   | 0.98904(8) |
| Mn1 | 4b   | 0.24948   | 0.16699   | 0.00234   | 0.01096(8) |
| Mg  | 2a   | 0.000     | 0.3540(4) | 0.4140(5) | 1.00(6)    |
| Mn2 | 2a   | 0.000     | 0.3540(4) | 0.4100(5) | 0.00(6)    |
| Ge  | 2a   | 0.000     | 0.6689(9) | 0.0090(2) | 1.00       |
| O1  | 4b   | 0.2020(2) | 0.8470(4) | 0.8890(2) | 1.00       |
| O2  | 2a   | 0.000     | 0.3170(7) | 0.8920(7) | 1.00       |
| O3  | 2a   | 0.000     | 0.6950(6) | 0.3500(2) | 1.00       |

**Table S5** Lattice parameters and agreement factors for Li<sub>2- $x$</sub> MgGeO<sub>4</sub>: $x$ Mn<sup>2+</sup> ( $x = 0.015$ ) refined by Rietveld method.

| Doped concentration | $x = 0.015$  |
|---------------------|--------------|
| Crystal system      | orthorhombic |
| Space group         | $Pmn2_1$     |
| $a$ (Å)             | 6.39737(4)   |
| $b$ (Å)             | 5.47772(8)   |
| $c$ (Å)             | 4.99875(6)   |

|                          |            |
|--------------------------|------------|
| Volume (Å <sup>3</sup> ) | 175.17(10) |
| Z                        | 2          |
| R <sub>p</sub> (%)       | 10.59      |
| R <sub>wp</sub> (%)      | 11.23      |
| S                        | 1.06       |

**Table S6** Refined atomic positions for Li<sub>2-x</sub>MgGeO<sub>4</sub>:xMn<sup>2+</sup> (x = 0.015).

|    | Np | x          | y          | z          | Occupancy  |
|----|----|------------|------------|------------|------------|
| Li | 4  | 0.24948    | 0.16699    | 0.00234    | 0.98809(6) |
| Mn | 4  | 0.24948    | 0.16699    | 0.00234    | 0.01191(6) |
| Mg | 2  | 0.00000    | 0.33625(2) | 0.50052(7) | 1.0        |
| Ge | 2  | 0.00000    | 0.67423(4) | 0.00679(2) | 1.0        |
| O1 | 4  | 0.21375(6) | 0.82382(3) | 0.89577(6) | 1.0        |
| O2 | 2  | 0.00000    | 0.36904(5) | 0.89187(3) | 1.0        |
| O3 | 2  | 0.00000    | 0.66978(2) | 0.35710(4) | 1.0        |

#### References

- 1 X. Ji, J. Zhang, Y. Li, S. Liao, X. Zhang, Z. Yang, Z. Wang, Z. Qiu, W. Zhou, L. Yu and S. Lian, *Chem. Mater.*, 2018, **30**, 5137-5147.
- 2 M. Xin, Z. H. Huang, M. H. Fang, Y. G. Liu, C. Tang and X. W. Wu, *Inorg. Chem.*, 2014, **53**, 6060-6065.
